# Supplementary material for: Biocompatible composite nanoparticles with large longitudinal relaxivity for targeted imaging and early diagnosis of cancer
Source: Royal Society of Chemistry journal article supplement (doi:10.1039/c3tb20648c), 2013-01-01
Supplement: c3tb20648c.pdf [file c3tb20648c.pdf]

## Supporting information

### **Biocompatible composite nanoparticles with large longitudinal relaxivity for targeted imaging and early diagnosis of cancer**

Xuehua Ma<sup>a</sup>, An Gong<sup>a</sup>, Lingchao Xiang<sup>a</sup>, Tianxiang Chen<sup>a</sup>, Yuexia Gao<sup>a</sup>, Xingjie Liang<sup>b</sup>, Zheyu Shen<sup>a\*</sup> and Aiguo Wu<sup>a\*</sup>

<sup>a</sup>*Key Laboratory of Magnetic Materials and Devices, Chinese Academy of Sciences,  
& Division of Functional Materials and Nano Devices, Ningbo Institute of Materials  
Technology & Engineering, Chinese Academy of Sciences, Ningbo, Zhejiang 315201,  
China*

<sup>b</sup>*Key Laboratory for Biomedical Effects of Nanomaterials and Nanosafety, National  
Center for Nanoscience and Technology of China, Chinese Academy of Sciences,  
Beijing100190, China*

\*Corresponding authors

Email: shenzheyu@nimte.ac.cn; or aiguo@nimte.ac.cn

Tel: +86 574 87617278, or +86 574 86685039; Fax: +86-86685163

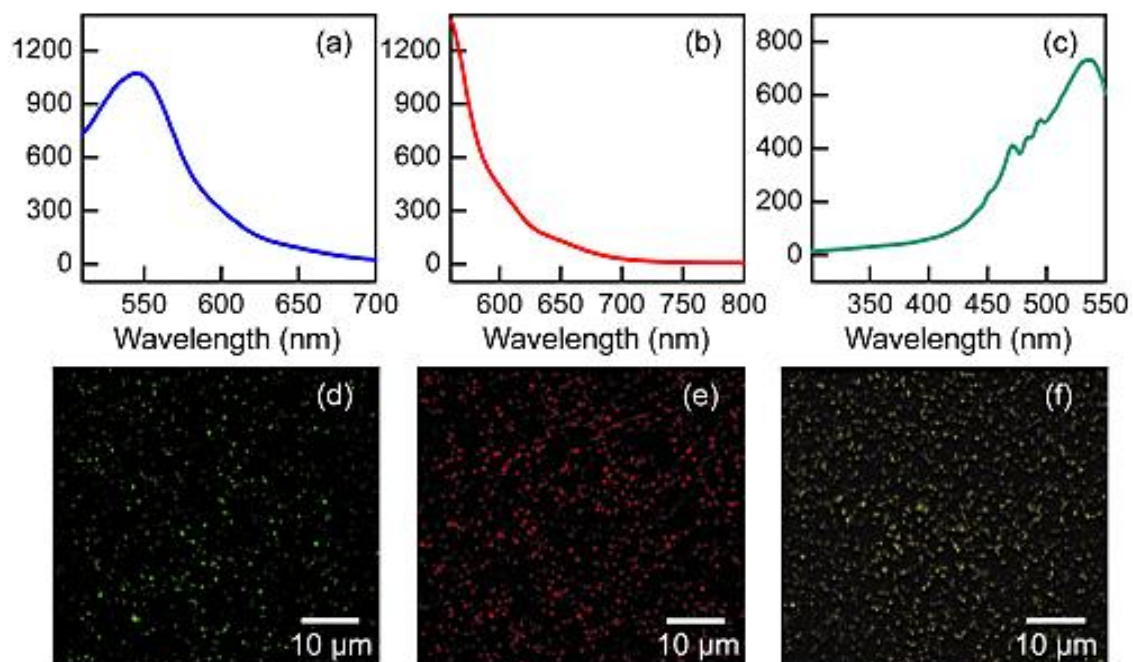

Figure S1. Fluorescence emission spectra of AN excited at 488 nm (a) or 540 nm (b). Fluorescence excitation spectrum of AN (EM 580 nm) (c). The concentration of AN was 1.0 mg/mL. Laser scanning confocal microscope (LSCM) images of AN observed at different emission wavelengths: (d) 500-540 nm (EX 488 nm), (e) 600-660 nm (EX 540 nm), (f) overlay.

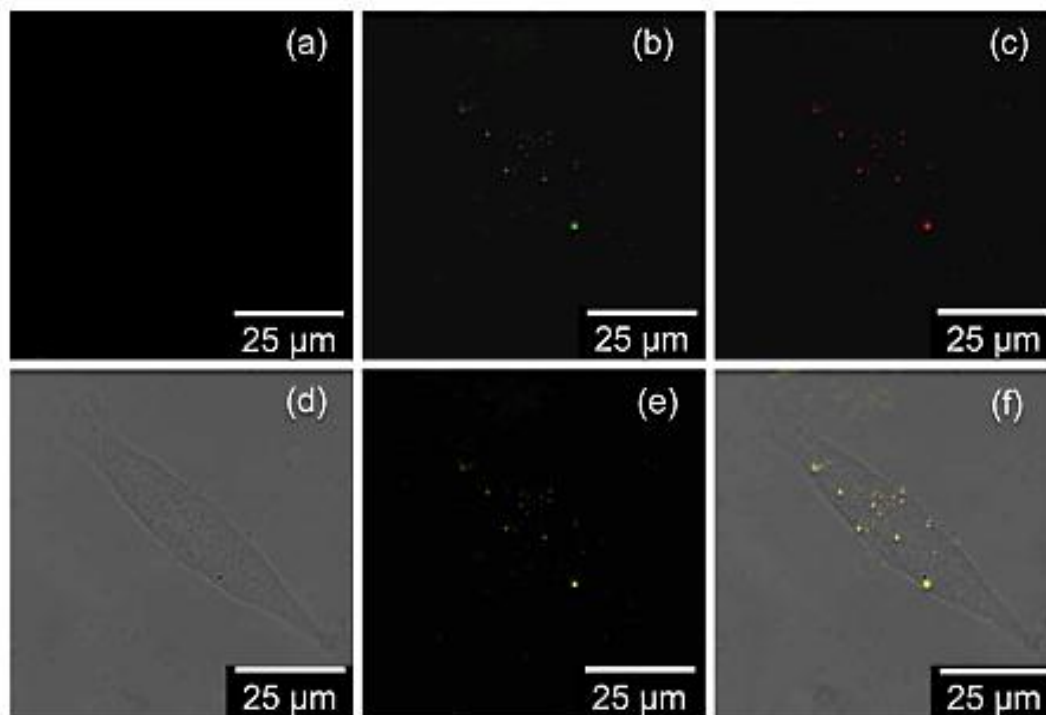

Figure S2. LSCM images of GON-AN2-FA-treated MCF-7 cells without staining of Hoechst and Rhodamine Palloidine. The images were observed at different emission wavelengths: (a) 420-480 nm (EX 350 nm), (b) 500-540 nm (EX 488 nm), (c) 600-660 nm (EX 540 nm), (e) overlay of (a), (b) and (c). (d) Image under normal light. (f) overlay of (a), (b), (c) and (d). The GON-AN2-FA concentration in the cultured medium was 200  $\mu\text{g/mL}$ .

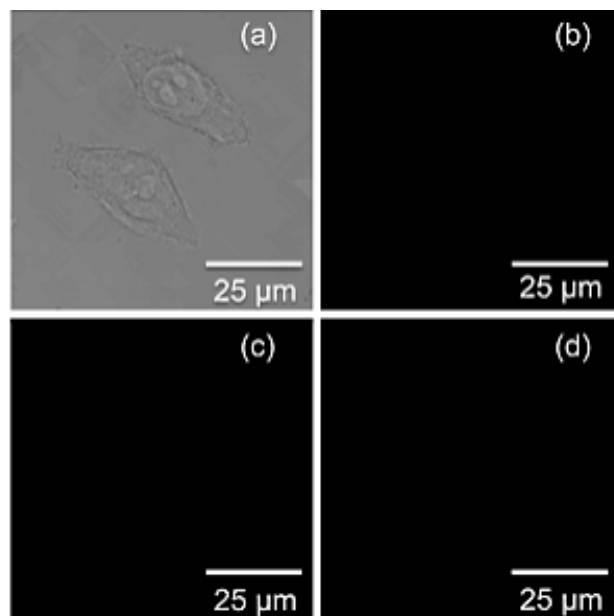

Figure S3. (a) Micrograph of MCF-7 cells untreated with nanoparticles under normal light. LSCM images of the untreated MCF-7 cells without staining of Hoechst and Rhodamine Palloidine observed at different emission wavelengths: (b) 420-480 nm (EX 350 nm), (c) 500-540 nm (EX 488 nm), (d) 600-660 nm (EX 540 nm).

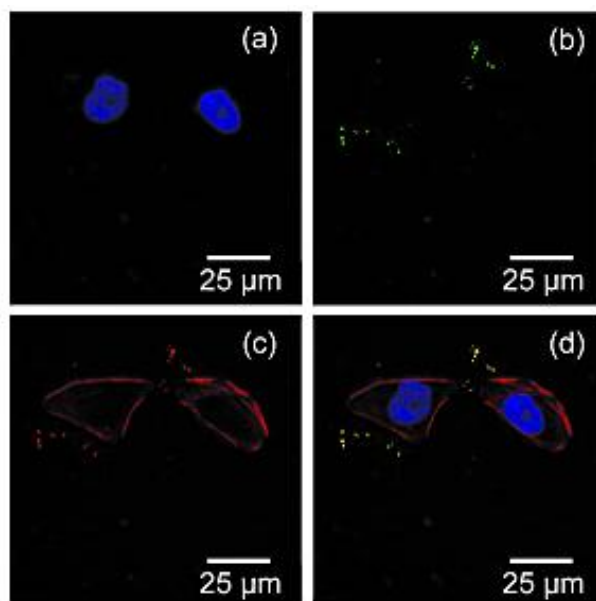

Figure S4. LSCM images of GON-AN2-FA-treated MCF-7 cells observed at different emission wavelengths: (a) 420-480 nm (EX 350 nm), (b) 500-540 nm (EX 488 nm), (c) 600-660 nm (EX 540 nm), (d) overlay of (a), (b) and (c). The MCF-7 cells were co-incubated with free folate (1.0 mM) and GON-AN2-FA (200  $\mu\text{g}/\text{mL}$ ). The cytoskeleton was stained with Rhodamine Phalloidin and the nucleus was stained with Hoechst.

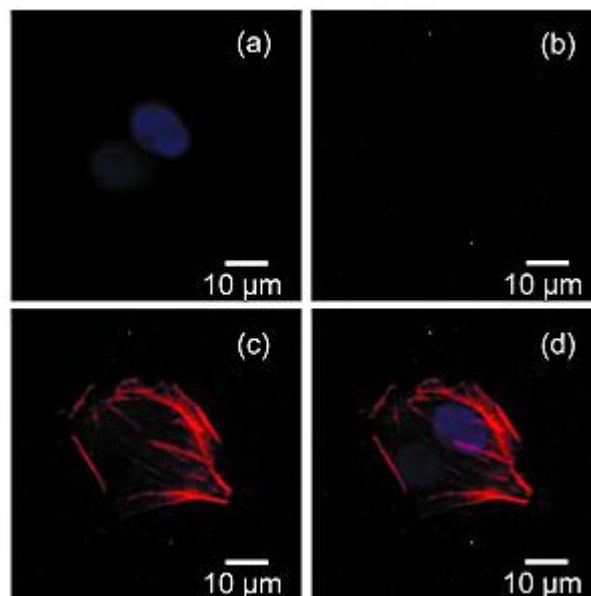

Figure S5. LSCM images of folate receptor alpha (FR $\alpha$ )-negative HpeG2 cells (treated with GON-AN2-FA) observed at different emission wavelengths: (a) 420-480 nm (EX 350 nm), (b) 500-540 nm (EX 488 nm), (c) 600-660 nm (EX 540 nm), (d) overlay of (a), (b) and (c). The GON-AN2-FA concentration in the cultured medium was 200  $\mu\text{g}/\text{mL}$ . The cytoskeleton was stained with Rhodamine Phalloidin and the nucleus was stained with Hoechst.
